1 **Inhibiting IFT dynein with ciliobrevin in *C. elegans* chemosensory cilia**

2 Jona Mijalkovic and Erwin J.G. Peterman\*

3 LaserLaB and Department of Physics and Astronomy, Vrije Universiteit Amsterdam, De

4 Boelelaan 1081, 1081 HV, Amsterdam, The Netherlands

5 \*Corresponding author: e.j.g.peterman@vu.nl

6

7

8

9

10

11

12

13

14

15

16

17

18

19

## 20 **Abstract**

21 Cytoplasmic dyneins play a role in a myriad of cellular processes, such as retrograde  
22 intracellular transport and cell division. Small-molecule cytoplasmic dynein antagonists,  
23 ciliobrevins, have recently been developed as tools to acutely probe cytoplasmic dynein  
24 function. Although widely used to investigate cytoplasmic dynein 1, far fewer studies explore  
25 the effect of ciliobrevin on cytoplasmic dynein 2 or IFT dynein. Here, we use ciliobrevin A to  
26 partially disrupt IFT dynein in the chemosensory cilia of living *C. elegans*. Acute, low-  
27 concentration ciliobrevin treatment results in shortening of cilia and reduction of transport  
28 velocity in both directions. After longer exposure to ciliobrevin, we find concentration-  
29 dependent motor accumulations and axonemal deformations. We propose that maintenance  
30 of ciliary length requires a high fraction of active IFT-dynein motors, while structural integrity  
31 can be preserved by only a few active motors.

32

## 33 **Introduction**

34 Cytoplasmic dyneins are large (~1.4MDa), multi-subunit, microtubule minus-end directed  
35 ATP-driven motor proteins with a wide range of vital, cellular functions [1]. Cytoplasmic  
36 dynein 1 plays, for example, a role in the axonal transport of cargo (e.g. membranous  
37 organelles, mRNA and proteins) and cellular positioning of the mitotic spindle, chromosomes  
38 and centrosomes. A second type of cytoplasmic dynein, called cytoplasmic dynein 2 or IFT  
39 dynein, drives retrograde intraflagellar transport (IFT) in cilia and flagella [2], cellular  
40 structures that act as antennae to detect and respond to changes in the extracellular  
41 environment and require motor-driven IFT for their assembly and maintenance [3-5].

42 Recent advances in understanding cytoplasmic dynein function *in vivo* have largely relied on  
43 gene modification tools such as MosSCI, CRISPR and expression regulation using RNAi [6-

44 9]. An important limitation of these methods is that they induce long-term cellular changes  
45 and thus cannot be used to probe the effect of acute and controlled (partial) dynein loss of  
46 function. To overcome this, small-molecule cytoplasmic dynein antagonists have been  
47 developed, enabling real-time motor inhibition [10-12]. Ciliobrevins are dihydroquinazolinone  
48 compounds discovered in a high-throughput screen for Hedgehog-signaling (Hh) pathway  
49 inhibitors [13]. In this screen, mouse fibroblast Hh-responsive cells treated with HPI-4 (later  
50 renamed ciliobrevin A) displayed shorter or absent cilia and accumulated transcription factor  
51 Gli2 and IFT-B particle subunit IFT88, pointing to perturbed retrograde transport [10, 13].  
52 Ciliobrevin A and its derivative ciliobrevin D have since been utilized to investigate dynein-1-  
53 driven processes in cultured cells, such as chromosome segregation [14, 15], axonal  
54 transport and elongation [16] and centrosome orientation [17, 18]. Ciliobrevin was  
55 additionally found to inhibit IFT-mediated gliding motility and membrane-protein transport in  
56 *Chlamydomonas*, highlighting its potential as a dynein-2 inhibitor *in vivo* [19, 20]. However,  
57 the use of ciliobrevins in other living organisms to probe IFT-dynein function has remained  
58 underexplored.

59 Here, we test the efficacy of ciliobrevin A as IFT-dynein inhibitor in living *C. elegans* and  
60 examine the effect of acute dynein perturbation on IFT-motor ensemble distributions and  
61 velocities. We find that IFT in *C. elegans* phasmid chemosensory cilia is not halted by acute,  
62 low-concentration ciliobrevin treatment, but slows down, resulting in shortening of the ciliary  
63 axoneme. After prolonged ciliobrevin exposure, we find concentration-dependent motor  
64 accumulations and axonemal deformations indicative of more severely impaired transport.  
65 Based on these findings, we propose that maintenance of maximum ciliary length requires a  
66 high fraction of active IFT-dynein motors, while structural integrity can be preserved by only a  
67 few active motors.

68

69

## 70 Results

### 71 Optimization of ciliobrevin A dosing in *C. elegans*

72 First, we sought to determine the dose required to exert an inhibitory effect on IFT dynein in  
73 *C. elegans* phasmid cilia. Nematodes expressing fluorescently-tagged IFT-dynein light  
74 intermediate chain XBX-1 (XBX1::GFP) were initially treated with 20-100  $\mu$ M ciliobrevin A,  
75 the concentration range reported to give maximum inhibitory response in different cell lines  
76 [10, 13, 16]. The animals were incubated in a ciliobrevin-containing solution or ciliobrevin-  
77 coated Nematode Growth Medium (NGM) plates with OP50 *E. coli* for 1 hour and then  
78 imaged using epifluorescence microscopy [21, 22]. We subsequently screened for changes  
79 in phasmid cilium length using long-exposure fluorescence images of XBX-1::EGFP. Visual  
80 inspection of the fluorescence images revealed that, in contrast to the cell lines studied  
81 before, no ciliary shortening was observed at these concentrations in *C. elegans*, suggesting  
82 that ciliobrevin does not elicit an inhibitory effect in this concentration range in the nematode.  
83 Exposure to increasingly higher doses resulted in observable ciliary shortening at  
84 concentrations above 0.7 mM, ~3-7 times higher than typically used in cell lines [10, 13, 16].  
85 This higher concentration could suggest that ciliobrevin has a lower affinity for *C. elegans* IFT  
86 dynein, but it more likely reflects limited penetration of the drug or absorption-related drug  
87 loss in the nematode. Moreover, it is consistent with dosing regimens of other small-molecule  
88 drugs in *C. elegans* that have been reported to be in the millimolar-range [23, 24].

89

90

91

92 **Acute ciliobrevin treatment results in roadblocks, ciliary**  
93 **shortening and impaired bidirectional transport**

94 To examine the effect of minimal but acute IFT-dynein inhibition, nematodes were subjected  
95 to 5-minute treatment with a “low”, 0.7 mM ciliobrevin dose (Fig 1A). Ciliobrevin is soluble in  
96 DMSO, a solvent that is toxic to *C. elegans* at concentrations above 2% V/V [25]. To test  
97 whether effects were specific to ciliobrevin and not induced by the 1% V/V DMSO used in the  
98 ciliobrevin experiments, we also treated nematodes with a control solution containing the  
99 same amount of DMSO. After dosing, the nematodes were allowed to recover briefly on  
100 unseeded NGM plates (2-3 minutes) and then anesthetized for 10 minutes using levamisole  
101 (Fig 1A). Ciliobrevin-induced ciliary shortening was quantified using long-exposure  
102 fluorescence images of XBX-1::EGFP (Fig 1B). In untreated nematodes, XBX1::EGFP is  
103 localized specifically to the chemosensory cilia and is distributed across the entire cilium [21,  
104 22]. In control-treated nematodes, the average length occupied by XBX-1 was  $8.33 \pm 0.34$   
105  $\mu\text{m}$  (average  $\pm$  s.e.m), in agreement with previous length determination of *C. elegans* cilia  
106 [22, 26]. After acute, low-concentration ciliobrevin A treatment, the average length occupied  
107 markedly reduced to  $5.85 \pm 0.44 \mu\text{m}$  (Fig 1C). Our results confirm that, similar to  
108 observations in *Chlamydomonas* and ciliated cells, ciliobrevin can induce ciliary shortening in  
109 *C. elegans* [19].

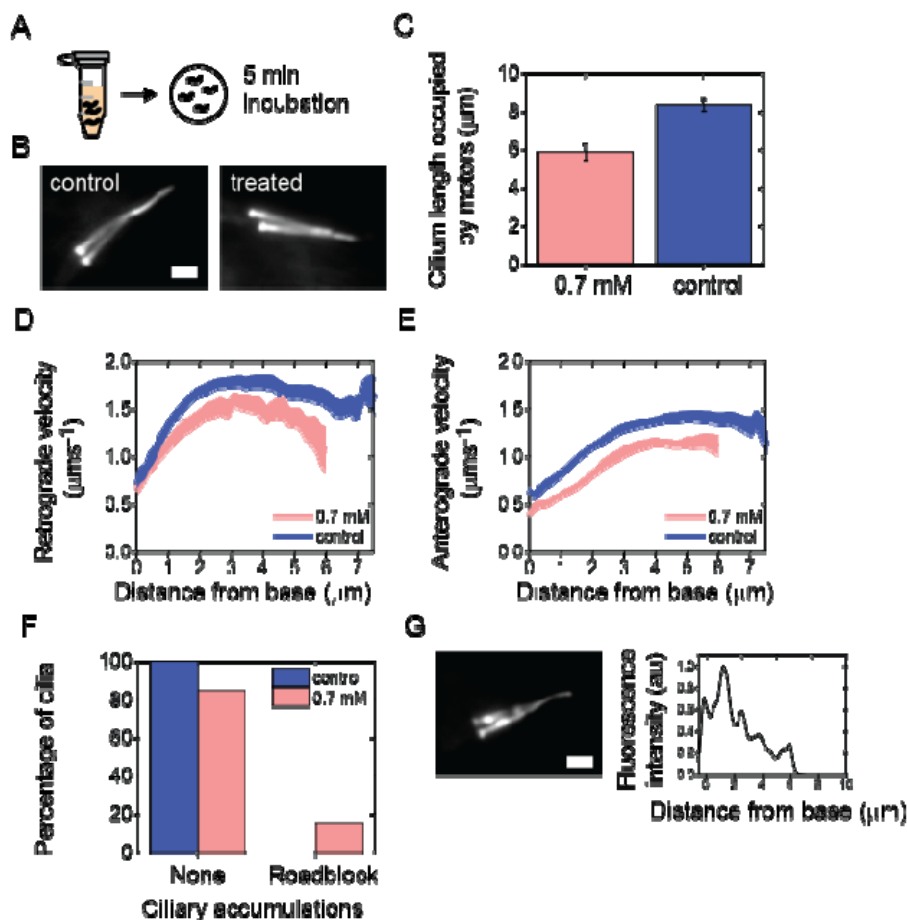

110

111 **Fig 1. Acute ciliobrevin treatment results in roadblocks and ciliary shortening.**

112 **(A)** Dosing schematic: 5-minute exposure to 0.7 mM ciliobrevin A or control (2% DMSO in  
113 M9). **(B)** Example of summed fluorescence intensity images (150 subsequent images) of  
114 XBX-1 (XBX-1::EGFP) in cilia of treated and control animals. Scale bar 2  $\mu\text{m}$ . **(C)** Average  
115 length occupied by XBX-1 after exposure to 70 mM ciliobrevin A (light red; n=11 cilia) or  
116 control (blue; n=4 cilia). Error is s.e.m. **(D)** Extent of XBX-1 accumulation in worms treated  
117 with 70 mM ciliobrevin A (light red) and control (2% (V/V) DMSO in M9; blue). **(D)** Average  
118 retrograde XBX-1 velocity after exposure to 70 mM ciliobrevin A (n=38 trains from 11 cilia; 8  
119 worms) and control (n=24 trains from 4 cilia; 4 worms). **(E)** Average anterograde XBX-1  
120 velocity after exposure to 70 mM ciliobrevin A (n=44 trains from 11 cilia; 8 worms) and  
121 control (n=24 trains from 4 cilia; 4 worms). Line thickness represents s.e.m. **(F)** Example

122 summed fluorescence intensity image of XBX-1 (XBX-1::EGFP) and corresponding  
123 normalized fluorescence intensity profile showing roadblock accumulations. Scale bar 2  $\mu$ m.  
124

125 To determine whether the velocity of IFT trains is affected by acute ciliobrevin treatment, we  
126 next generated direction-filtered kymographs and extracted position-dependent velocities of  
127 XBX-1::EGFP using KymographClear and KymographDirect (Fig 1D, E) [27]. In the  
128 retrograde direction (tip to base, Fig 1D) IFT dynein is the active driver of transport, but in the  
129 anterograde direction (base to tip, Fig 1E) IFT dynein is carried as cargo by the kinesin-2  
130 family motors OSM-3 and kinesin-II. We found that retrograde IFT-train velocity is reduced by  
131 ~12%, suggesting rapid inhibition of (at least some) IFT-dynein motors participating in  
132 transport. Interestingly, kinesin-2-driven anterograde transport was also reduced (~21%).  
133 While the original report by Firestone *et al* suggested that ciliobrevin A and D do not affect  
134 kinesin-1-dependent microtubule gliding in *in vitro* assays with only kinesin-1, our data is  
135 consistent with studies in primary neurons showing that ciliobrevin D affects both  
136 anterograde and retrograde transport [16, 28]. Similarly, in *Chlamydomonas*, anterograde  
137 transport impairment occurs already 2 minutes after treatment [19]. It is possible that  
138 ciliobrevin is not specific to the cytoplasmic dynein ATP binding site, but interpretation of  
139 these findings is difficult owing to the strong interdependence between anterograde and  
140 retrograde transport [29]. Functional IFT requires continuous turnover and impairment of  
141 retrograde transport could thus indirectly lead to impairment of anterograde transport [30].  
142 Another possibility is that anterograde IFT trains require functional, uninhibited dynein motors  
143 [31].

144 Next, we used the long-exposure fluorescence images to visualize the effect of ciliobrevin A  
145 on XBX-1 distribution. In all control-treated cilia there were no visible accumulations of  
146 motors along the cilium (Fig 1B, F). In 15.4% of the acutely ciliobrevin-treated cilia, however,  
147 we observed XBX-1 accumulations at non-specific locations along the cilium (Fig 1F, G). We  
148 attribute these “roadblock” accumulations to inhibition of a small subset of IFT-dynein motors,

149 resulting in stalled IFT trains. These non-moving IFT trains can be bypassed by active  
150 motors (Movie S1), indicating that they do not completely block IFT. Taken together, our  
151 findings affirm the efficacy of ciliobrevin A in the phasmid cilia of living *C. elegans*.  
152 Importantly, we show that acute IFT-dynein inhibition using a minimal ciliobrevin  
153 concentration does not completely halt IFT. While the number of functional dynein motors is  
154 likely diminished, IFT is maintained, albeit at a lower velocity, resulting in a reduced ciliary  
155 length.

156

157

## 158 **Prolonged ciliobrevin A treatment leads to concentration-** 159 **and velocity-dependent ciliary shortening**

160 To explore the effect of more prolonged inhibition of IFT dynein, we subjected nematodes to  
161 1 hour treatment with low- and high-concentration ciliobrevin (0.7 and 1.4 mM in 2% DMSO,  
162 respectively), or 2% DMSO solution as control. Due to the limited solubility of ciliobrevin and  
163 DMSO toxicity (above 2% V/V), 1.4 mM was the highest ciliobrevin concentration attainable  
164 in our experiments. In control-treated nematodes, the average distance occupied by motors  
165 was  $8.25 \pm 0.18 \mu\text{m}$ , similar to control experiments with 1% DMSO (Fig 2A). After 1-hour  
166 treatment with 0.7 mM and 1.4 mM ciliobrevin, cilia appeared shorter and the average length  
167 occupied by XBX-1::EGFP reduced to  $6.91 \pm 0.17 \mu\text{m}$  and  $6.11 \pm 0.30 \mu\text{m}$  respectively. To  
168 probe whether the observed shortening is due to motor retraction or axonemal shortening,  
169 we also exposed animals with labeled ciliary tubulin TBB-4::EGFP to 1.4 mM ciliobrevin  
170 solution. The average cilium length in these animals was  $5.59 \pm 0.22 \mu\text{m}$  (Fig 2A), confirming  
171 that ciliobrevin induces retraction of the axoneme. To obtain further insight into ciliary  
172 shortening, we plotted the distribution of post-treatment length occupied by XBX-1 for each  
173 treatment (Fig 2A). While in all low-concentration-treated worms XBX-1 extended from base



174 to beyond the proximal segment, in some high-concentration treated worms we observed  
175 XBX-1 only occupying the first 2 – 4  $\mu\text{m}$  of the cilium, most likely indicating retraction of (part  
176 of) the proximal segment. Such severe truncations were not observed with acute or  
177 prolonged low-concentration treatment, revealing concentration-dependent ciliary shortening  
178 in response to prolonged ciliobrevin treatment (Fig 1C, Fig 2A).

179

180

181

182

183

184

185

186

187

188

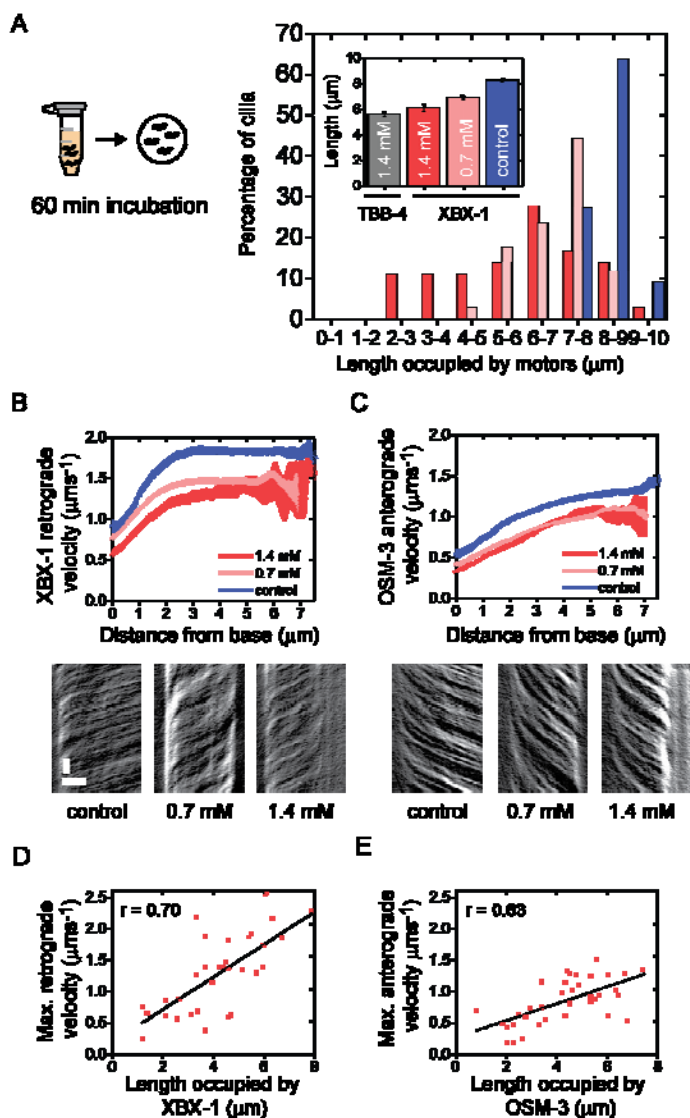

189

190 **Fig 2. Concentration- and velocity-dependent ciliary shortening after ciliobrevin A**  
 191 **exposure.**

192 **(A)** Dosing schematic: 60-minute exposure to ciliobrevin A or control (2% DMSO in M9).  
 193 Inset: Average cilium length (TBB-4, grey, n=39) and average ciliary length occupied by  
 194 XBX-1 after 60-minute exposure to 0.7 mM ciliobrevin A (light red, n=34), 1.4 mM ciliobrevin  
 195 (red, n=39) or control (blue). Error is s.e.m. Graph: Distribution of cilium lengths occupied by  
 196 XBX-1 after 60-minute exposure to ciliobrevin A or control. **(B)** Train-averaged XBX-1  
 197 retrograde velocity after exposure to 0.7 mM ciliobrevin A (n=130 trains from 34 cilia; 18

198 worms), 1.4 mM ciliobrevin A (n=138 trains from 35 cilia; 19 worms) and control (n=79 trains  
199 from 11 cilia; 7 worms). Line thickness represents s.e.m. Representative corresponding  
200 kymographs are shown. Time: vertical; scale bar 2 s. Position: horizontal; scale bar 2  $\mu$ m. **(C)**  
201 Train-averaged OSM-3 anterograde velocity and representative kymographs after exposure  
202 to 0.7 mM ciliobrevin A (n=136 trains from 34 cilia; 18 worms), 1.4 mM ciliobrevin A (n=146  
203 trains from 35 cilia; 19 worms) and control (n=44 trains from 11 cilia; 7 worms). Line  
204 thickness represents s.e.m. **(D-E)** Maximum XBX-1 (D) and OSM-3 (E) velocity versus ciliary  
205 length occupied by motors. Red squares: data points; black lines represent regression lines  
206 obtained from a Pearson's correlation analysis (correlation coefficient r: 0.70 for XBX-1 and  
207 0.63 for OSM-3).

208

209 We next investigated the effect of prolonged ciliobrevin treatment on IFT-motor velocity using  
210 a dual-label *C. elegans* strain with fluorescently-tagged IFT dynein and one of the  
211 anterograde kinesin-2 motors, OSM-3 [22]. We recorded fluorescence image sequences of  
212 IFT dynein (XBX-1::EGFP) and OSM-3 (OSM-3::mCherry) and generated kymographs.  
213 Position-dependent velocities were then extracted using KymographClear and  
214 KymographDirect (Fig 2B, C) [27]. Prolonged treatment with ciliobrevin resulted in a ~24% (at  
215 0.7 mM) and ~36% (at 1.4 mM) lower retrograde IFT-dynein velocity (Fig 2B). The  
216 anterograde (OSM-3) velocity was also reduced, by ~31% (at 0.7 mM) and ~34% (at 1.4 mM;  
217 Fig 2C). These results show that higher concentrations of ciliobrevin and longer exposure to  
218 the drug result in a larger reduction of the velocity in both directions. To further explore the  
219 relationship between cilium length and IFT velocity, we plotted the maximum anterograde  
220 (Fig 2D) and retrograde (Fig 2E) velocity for each cilium. We observe a clear trend  
221 (Pearson's  $r = 0.70$  and  $0.63$  for XBX-1 and OSM-3 respectively) between maximally attained  
222 IFT velocities and length of cilium occupied by motors, suggesting that the extent of ciliary  
223 shortening could be velocity-dependent.

## 224 **Prolonged ciliobrevin A exposure leads to altered motor** 225 **distribution**

226 To investigate the effect of prolonged ciliobrevin A exposure on IFT-dynein distribution, we  
227 characterized the extent of IFT-dynein accumulations after high- and low-concentration  
228 treatment (Fig 3). As expected, in control-treated nematodes there were no aberrant motor  
229 accumulations (2% DMSO; Fig 3A). In nematodes that underwent prolonged, low-  
230 concentration treatment, 50% of phasmid cilia had no motor accumulations and 29% had  
231 “roadblock” accumulations at apparently random positions along the cilium. In a smaller  
232 fraction of the cilia (9%) we observed IFT-dynein accumulations only at the ciliary tip (Fig  
233 3B), consistent with defective retrograde transport. The observation of tip accumulation of  
234 IFT components upon ciliobrevin treatment is consistent with earlier studies in cell lines[10]  
235 and *Chlamydomonas* [19]. In some cilia (12%), motor accumulation in the distal segment  
236 was more substantial, covering at least 1  $\mu\text{m}$  of the distal segment including tip (Fig 3C). In  
237 nematodes that underwent prolonged, high-concentration ciliobrevin treatment we observed  
238 more severe disruptions of the IFT-dynein distribution. 13% of the cilia showed motor  
239 accumulation only at the tip, while in 33% of cilia dynein motors had stalled in the entire distal  
240 segment, substantially affecting the integrity of the axoneme (Fig 3C). We hypothesize that in  
241 these nematodes there are too few active IFT-dynein motors left to maintain bidirectional IFT,  
242 resulting in (partial) collapse of the axoneme. In some cases, we observed a remarkable  
243 heterogeneity in the response to ciliobrevin between the two cilia in a phasmid pair within  
244 one organism, despite identical exposure. In the example shown in Fig 3B, one phasmid  
245 cilium is substantially shortened while the other has maintained its full length. These  
246 observations suggest that there is a balance point in the number of functional IFT  
247 components required for distal segment maintenance and structural integrity (Fig 3F). In this  
248 view, only a small fluctuation of component numbers below this balance point, in a given  
249 cilium at a given time, will result in collapse of IFT and ciliary structure. In addition, after

250 prolonged high-concentration treatment (but not in acute or prolonged low-concentration  
251 treatment) we observed structural aberrations of the cilia in some nematodes, such as tight  
252 bends (Fig 3E). This could be due to a ciliobrevin-induced effect on tubulin structure or  
253 disruption of IFT-mediated tubulin transport [16, 32] at these high concentrations.

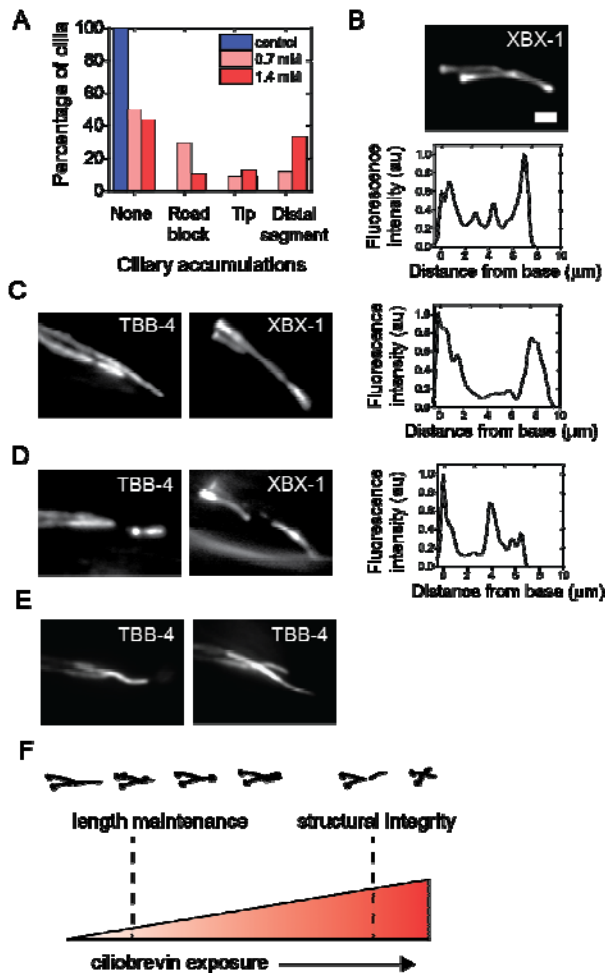

254

255 **Fig 3. Concentration-dependent effects on motor distribution and the ciliary axoneme.**

256 **(A)** Extent of XBX-1 accumulation in worms treated with 0.7 mM ciliobrevin A (light red), 1.4  
257 mM ciliobrevin A (red) and control (2% DMSO in M9; blue). **(B-D)** Example summed  
258 fluorescence intensity images of XBX-1 (XBX-1::EGFP) and TBB-4 (TBB-4::EGFP) and  
259 corresponding normalized XBX-1 fluorescence intensity profile showing tip accumulation **(B)**  
260 and distal segment accumulation **(C, D)**. **(E)** Example summed fluorescence intensity images

261 of TBB-4 after 1.4 mM ciliobrevin treatment showing axonemal malformations. Scale bar 2  
262  $\mu\text{m}$ . **(F)** Model of ciliobrevin-induced IFT-dynein inhibition on IFT. The axonemal length  
263 maintenance balance-point is easily disturbed, whereas structural integrity can be maintained  
264 with a much lower number of active IFT-dynein motors.

265

266 Taken together, our findings enable us to propose a model of the ciliary effects of IFT-dynein  
267 inhibition by ciliobrevin. Acute, low-concentration treatment results in axonemal shortening  
268 coupled with a reduction in IFT velocity in both directions, suggesting that both maximum  
269 ciliary length and IFT-velocity maintenance require a relatively high number of active IFT-  
270 dynein motors. At higher ciliobrevin concentrations, motors become slower and cilia become  
271 even shorter, until only a few active motors remain, tipping the balance of ciliary structure,  
272 resulting in severely truncated cilia with axonemal defects.

273

## 274 **Discussion**

275 The recent development of ciliobrevins has made it possible to acutely inhibit cytoplasmic  
276 dynein in several cellular systems [10]. Here, we show that ciliobrevin A, dosed in the low  
277 millimolar range, can exert an inhibitory effect on IFT dynein in *C. elegans* phasmid  
278 chemosensory cilia.

279 Although we have shown that ciliobrevin A can inhibit IFT dynein in living *C. elegans*, there  
280 are several caveats to using it as a quantitative and well-controllable tool to probe dynein  
281 function. Firstly, the pharmacokinetics of ciliobrevin in *C. elegans* is unknown and ciliobrevin  
282 might not be specific to one cytoplasmic dynein subtype. Therefore, if uptake primarily takes  
283 place through the mouth instead of the ciliary openings, dynein-1-driven function and  
284 dendritic transport could also be affected. Additionally, the absolute intracellular ciliobrevin  
285 concentration is unknown and could be up to 40 times lower than the extracellular dose [24].

286 Secondly, in IFT, motors work in teams of several tens of motors and we cannot currently  
287 determine the number of motors actively engaged in transport. As such, ciliobrevin  
288 concentration is the only surrogate for the number of (in)active motors, but this relationship  
289 may not necessarily be linear.

290 Notwithstanding these limitations, we have made some clear observations of the effects of  
291 ciliobrevin on IFT in *C. elegans* phasmid cilia. The first effects of acute ciliobrevin treatment  
292 are that IFT velocity has decreased 12-21%, both in anterograde and retrograde direction,  
293 and that cilia are ~30% shorter. These effects occur before IFT motors accumulate at the  
294 ciliary tip, as we observe after longer exposure, consistent with previous studies on cells [10].  
295 As a consequence, these first effects represent the initial response of the IFT system to  
296 minimal IFT-dynein perturbation. A lower IFT-dynein velocity can be attributed to frictional  
297 drag or less efficient collective motion due to ciliobrevin-induced inhibition of a subset of  
298 motors [33]. The lower velocity appears to correlate with the retraction of the axoneme. This  
299 suggests that a minimum IFT-train velocity (and potentially a minimum number of active IFT-  
300 dynein motors) is required for the maintenance of the full length of the cilium. Reduced IFT  
301 velocities have also been observed in *Chlamydomonas* mutants with shorter flagella[34]. In  
302 *Chlamydomonas* experiments where flagellar shortening was induced by a pH shock, long  
303 flagella also had higher IFT velocities than shorter flagella [35]. IFT trains, however, were  
304 larger in short than in long flagella, leading to a balance-point model based on train size [35].  
305 To connect our findings with those in *Chlamydomonas*, it would be interesting to detect how  
306 many motors are actively engaged with the axoneme at a given time on an IFT train, but  
307 such tools are currently lacking *in vivo*.

308 Our results suggest that IFT is relatively robust. Despite inhibition of a subset of IFT-dynein  
309 motors, bidirectional transport still continues, albeit at a lower velocity, resulting in a shorter  
310 axoneme. Such adaptations to mild perturbations of ciliary processes could be necessary for  
311 quick responses to extracellular changes.

## 312 **Materials and Methods**

### 313 ***C. elegans* strains and dosing**

314 *C. elegans* were maintained according to standard procedures. Nematodes were grown at  
315 20°C on Nematode Growth Medium (NGM) plates seeded with *Escherichia coli* OP50  
316 bacteria. The strains used in this study, EJP212 (XBX-1::EGFP, OSM-3::mCherry) [22] and  
317 EJP401 (TBB4::EGFP), were generated using Mos1-mediated single-copy insertion  
318 (MosSCI) [36]. Ciliobrevin A powder (H4541, Sigma Aldrich) was dissolved in fresh DMSO at  
319 maximum solubility to make a 140 mM stock solution stored at -20°C for a maximum of 1  
320 month (after 1 month we observed loss of efficacy). The ciliobrevin dosing solution was made  
321 by diluting this stock solution in M9 to 1.4 mM (2% (V/V) DMSO content) or 0.7 mM (1%  
322 DMSO content) and used the same day. Control (vehicle) dosing solutions were made by  
323 dissolving DMSO in M9 (1% and 2% DMSO). Young adult hermaphrodites were dosed by  
324 transferring to standard 0.2 ml PCR tubes (Thermo Scientific) with 0.7 mM or 1.4 mM  
325 ciliobrevin solution for 5 min or 60 min. Nematodes were allowed to recover on unseeded  
326 NGM plates for 2-3 minutes post-dosing.

### 327 **Fluorescence imaging and analysis**

328 *C. elegans* were anesthetized with 5mM levamisole in M9 and immobilized on a 2% agarose  
329 in M9 pad covered with a 22 × 22 mm cover glass and sealed with VaLaP. Fluorescence  
330 imaging was done using a custom-built epi-illuminated fluorescence microscope as  
331 described previously [22, 26]. Fluorescence images were analyzed using KymographDirect  
332 and KymographClear [27].

333

334



## 335 Acknowledgements

336 We acknowledge financial support from the Netherlands Organization for Scientific Research  
337 (NOW) via a Vici grant (E.J.G.P.). We thank Pierre Mangeol for help with the dosing set-up in  
338 the initial stages of the project.

## 339 References

- 340 1. Cianfrocco MA, DeSantis ME, Leschziner AE, Reck-Peterson SL. Mechanism and  
341 Regulation of Cytoplasmic Dynein. Annual review of cell and developmental biology.  
342 2015;31:83-108. Epub 2015/10/06. doi: 10.1146/annurev-cellbio-100814-125438. PubMed  
343 PMID: 26436706; PubMed Central PMCID: PMC4644480.
- 344 2. Hou Y, Witman GB. Dynein and intraflagellar transport. Experimental cell research.  
345 2015;334(1):26-34. Epub 2015/03/01. doi: 10.1016/j.yexcr.2015.02.017. PubMed PMID:  
346 25725253; PubMed Central PMCID: PMC4433774.
- 347 3. Singla V, Reiter JF. The primary cilium as the cell's antenna: signaling at a sensory  
348 organelle. Science (New York, NY). 2006;313(5787):629-33. Epub 2006/08/05. doi:  
349 10.1126/science.1124534. PubMed PMID: 16888132.
- 350 4. Scholey JM. Intraflagellar transport. Annual review of cell and developmental biology.  
351 2003;19:423-43. Epub 2003/10/23. doi: 10.1146/annurev.cellbio.19.111401.091318. PubMed  
352 PMID: 14570576.
- 353 5. Rosenbaum JL, Witman GB. Intraflagellar transport. Nature reviews Molecular cell  
354 biology. 2002;3(11):813-25. Epub 2002/11/05. doi: 10.1038/nrm952. PubMed PMID:  
355 12415299.
- 356 6. He Y, Francis F, Myers KA, Yu W, Black MM, Baas PW. Role of cytoplasmic dynein in  
357 the axonal transport of microtubules and neurofilaments. The Journal of cell biology.  
358 2005;168(5):697-703. Epub 2005/02/25. doi: 10.1083/jcb.200407191. PubMed PMID:  
359 15728192; PubMed Central PMCID: PMC171826.
- 360 7. Li W, Yi P, Ou G. Somatic CRISPR-Cas9-induced mutations reveal roles of  
361 embryonically essential dynein chains in *Caenorhabditis elegans* cilia. The Journal of cell  
362 biology. 2015;208(6):683-92. Epub 2015/03/18. doi: 10.1083/jcb.201411041. PubMed PMID:  
363 25778918; PubMed Central PMCID: PMC4362450.
- 364 8. Hao L, Efimenko E, Swoboda P, Scholey JM. The retrograde IFT machinery of *C.*  
365 *elegans* cilia: two IFT dynein complexes? PloS one. 2011;6(6):e20995. Epub 2011/06/23.  
366 doi: 10.1371/journal.pone.0020995. PubMed PMID: 21695221; PubMed Central PMCID:  
367 PMC3112216.
- 368 9. Reck J, Schauer AM, VanderWaal Mills K, Bower R, Tritschler D, Perrone CA, et al.  
369 The role of the dynein light intermediate chain in retrograde IFT and flagellar function in  
370 *Chlamydomonas*. Molecular biology of the cell. 2016;27(15):2404-22. Epub 2016/06/03. doi:  
371 10.1091/mbc.E16-03-0191. PubMed PMID: 27251063; PubMed Central PMCID:  
372 PMC4966982.
- 373 10. Firestone AJ, Weinger JS, Maldonado M, Barlan K, Langston LD, O'Donnell M, et al.  
374 Small-molecule inhibitors of the AAA+ ATPase motor cytoplasmic dynein. Nature.  
375 2012;484(7392):125-9. Epub 2012/03/20. doi: 10.1038/nature10936. PubMed PMID:  
376 22425997; PubMed Central PMCID: PMC3321072.
- 377 11. See SK, Hoogendoorn S, Chung AH, Ye F, Steinman JB, Sakata-Kato T, et al.  
378 Cytoplasmic Dynein Antagonists with Improved Potency and Isoform Selectivity. ACS

- 379 chemical biology. 2016;11(1):53-60. Epub 2015/11/12. doi: 10.1021/acscchembio.5b00895.  
380 PubMed PMID: 26555042; PubMed Central PMCID: PMC4715766.
- 381 12. Hoing S, Yeh TY, Baumann M, Martinez NE, Habenberger P, Kremer L, et al.  
382 Dynarrestin, a Novel Inhibitor of Cytoplasmic Dynein. *Cell chemical biology*. 2018;25(4):357-  
383 69.e6. Epub 2018/02/06. doi: 10.1016/j.chembiol.2017.12.014. PubMed PMID: 29396292.
- 384 13. Hyman JM, Firestone AJ, Heine VM, Zhao Y, Ocasio CA, Han K, et al. Small-  
385 molecule inhibitors reveal multiple strategies for Hedgehog pathway blockade. *Proceedings*  
386 *of the National Academy of Sciences of the United States of America*. 2009;106(33):14132-7.  
387 Epub 2009/08/12. doi: 10.1073/pnas.0907134106. PubMed PMID: 19666565; PubMed  
388 Central PMCID: PMC2721821.
- 389 14. Sikirzhyski V, Magidson V, Steinman JB, He J, Le Berre M, Tikhonenko I, et al. Direct  
390 kinetochore-spindle pole connections are not required for chromosome segregation. *The*  
391 *Journal of cell biology*. 2014;206(2):231-43. Epub 2014/07/16. doi: 10.1083/jcb.201401090.  
392 PubMed PMID: 25023516; PubMed Central PMCID: PMC4107786.
- 393 15. Miao Y, Zhou C, Cui Z, Tang L, ShiYang X, Lu Y, et al. Dynein promotes porcine  
394 oocyte meiotic progression by maintaining cytoskeletal structures and cortical granule  
395 arrangement. *Cell cycle (Georgetown, Tex)*. 2017;16(21):2139-45. Epub 2017/09/22. doi:  
396 10.1080/15384101.2017.1380133. PubMed PMID: 28933593; PubMed Central PMCID:  
397 PMC45731405.
- 398 16. Sainath R, Gallo G. The dynein inhibitor Ciliobrevin D inhibits the bidirectional  
399 transport of organelles along sensory axons and impairs NGF-mediated regulation of growth  
400 cones and axon branches. *Developmental neurobiology*. 2015;75(7):757-77. Epub  
401 2014/11/19. doi: 10.1002/dneu.22246. PubMed PMID: 25404503; PubMed Central PMCID:  
402 PMC4436090.
- 403 17. Yi J, Wu X, Chung AH, Chen JK, Kapoor TM, Hammer JA. Centrosome repositioning  
404 in T cells is biphasic and driven by microtubule end-on capture-shrinkage. *The Journal of cell*  
405 *biology*. 2013;202(5):779-92. Epub 2013/08/28. doi: 10.1083/jcb.201301004. PubMed PMID:  
406 23979719; PubMed Central PMCID: PMC3760611.
- 407 18. Liu X, Kapoor TM, Chen JK, Huse M. Diacylglycerol promotes centrosome  
408 polarization in T cells via reciprocal localization of dynein and myosin II. *Proceedings of the*  
409 *National Academy of Sciences of the United States of America*. 2013;110(29):11976-81.  
410 Epub 2013/07/03. doi: 10.1073/pnas.1306180110. PubMed PMID: 23818610; PubMed  
411 Central PMCID: PMC3718145.
- 412 19. Shih SM, Engel BD, Kocabas F, Bilyard T, Gennerich A, Marshall WF, et al.  
413 Intraflagellar transport drives flagellar surface motility. *eLife*. 2013;2:e00744. Epub  
414 2013/06/26. doi: 10.7554/eLife.00744. PubMed PMID: 23795295; PubMed Central PMCID:  
415 PMC3679542.
- 416 20. Cao M, Ning J, Hernandez-Lara CI, Belzile O, Wang Q, Dutcher SK, et al. Uni-  
417 directional ciliary membrane protein trafficking by a cytoplasmic retrograde IFT motor and  
418 ciliary ectosome shedding. *eLife*. 2015;4. Epub 2015/02/18. doi: 10.7554/eLife.05242.  
419 PubMed PMID: 25688564; PubMed Central PMCID: PMC4362204.
- 420 21. Schafer JC, Haycraft CJ, Thomas JH, Yoder BK, Swoboda P. XBX-1 encodes a  
421 dynein light intermediate chain required for retrograde intraflagellar transport and cilia  
422 assembly in *Caenorhabditis elegans*. *Molecular biology of the cell*. 2003;14(5):2057-70. Epub  
423 2003/06/13. doi: 10.1091/mbc.E02-10-0677. PubMed PMID: 12802075; PubMed Central  
424 PMCID: PMC165097.
- 425 22. Mijalkovic J, Prevo B, Oswald F, Mangeol P, Peterman EJ. Ensemble and single-  
426 molecule dynamics of IFT dynein in *Caenorhabditis elegans* cilia. *Nature communications*.  
427 2017;8:14591. Epub 2017/02/24. doi: 10.1038/ncomms14591. PubMed PMID: 28230057.
- 428 23. Bridi JC, Barros AG, Sampaio LR, Ferreira JC, Antunes Soares FA, Romano-Silva  
429 MA. Lifespan Extension Induced by Caffeine in *Caenorhabditis elegans* is Partially  
430 Dependent on Adenosine Signaling. *Frontiers in aging neuroscience*. 2015;7:220. Epub  
431 2015/12/24. doi: 10.3389/fnagi.2015.00220. PubMed PMID: 26696878; PubMed Central  
432 PMCID: PMC4672644.

- 433 24. Davies AG, Pierce-Shimomura JT, Kim H, VanHoven MK, Thiele TR, Bonci A, et al. A  
434 central role of the BK potassium channel in behavioral responses to ethanol in *C. elegans*.  
435 *Cell*. 2003;115(6):655-66. Epub 2003/12/17. PubMed PMID: 14675531.
- 436 25. Dengg M, van Meel JC. *Caenorhabditis elegans* as model system for rapid toxicity  
437 assessment of pharmaceutical compounds. *Journal of pharmacological and toxicological*  
438 *methods*. 2004;50(3):209-14. Epub 2004/11/03. doi: 10.1016/j.vascn.2004.04.002. PubMed  
439 PMID: 15519907.
- 440 26. Prevo B, Mangeol P, Oswald F, Scholey JM, Peterman EJ. Functional differentiation  
441 of cooperating kinesin-2 motors orchestrates cargo import and transport in *C. elegans* cilia.  
442 *Nature cell biology*. 2015;17(12):1536-45. Epub 2015/11/03. doi: 10.1038/ncb3263. PubMed  
443 PMID: 26523365.
- 444 27. Mangeol P, Prevo B, Peterman EJ. KymographClear and KymographDirect: two tools  
445 for the automated quantitative analysis of molecular and cellular dynamics using  
446 kymographs. *Molecular biology of the cell*. 2016. Epub 2016/04/22. doi: 10.1091/mbc.E15-  
447 06-0404. PubMed PMID: 27099372.
- 448 28. Roossien DH, Lamoureux P, Miller KE. Cytoplasmic dynein pushes the cytoskeletal  
449 meshwork forward during axonal elongation. *Journal of cell science*. 2014;127(16):3593-602.  
450 doi: 10.1242/jcs.152611.
- 451 29. Ocbina PJ, Eggenschwiler JT, Moskowitz I, Anderson KV. Complex interactions  
452 between genes controlling trafficking in primary cilia. *Nature genetics*. 2011;43(6):547-53.  
453 Epub 2011/05/10. doi: 10.1038/ng.832. PubMed PMID: 21552265; PubMed Central PMCID:  
454 PMCPMC3132150.
- 455 30. Marshall WF, Rosenbaum JL. Intraflagellar transport balances continuous turnover of  
456 outer doublet microtubules: implications for flagellar length control. *The Journal of cell*  
457 *biology*. 2001;155(3):405-14. Epub 2001/10/31. doi: 10.1083/jcb.200106141. PubMed PMID:  
458 11684707; PubMed Central PMCID: PMCPMC2150833.
- 459 31. Ling SC, Fahrner PS, Greenough WT, Gelfand VI. Transport of *Drosophila* fragile X  
460 mental retardation protein-containing ribonucleoprotein granules by kinesin-1 and  
461 cytoplasmic dynein. *Proceedings of the National Academy of Sciences of the United States*  
462 *of America*. 2004;101(50):17428-33. Epub 2004/12/08. doi: 10.1073/pnas.0408114101.  
463 PubMed PMID: 15583137; PubMed Central PMCID: PMCPMC536039.
- 464 32. Hao L, Thein M, Brust-Mascher I, Civelekoglu-Scholey G, Lu Y, Acar S, et al.  
465 Intraflagellar transport delivers tubulin isoforms to sensory cilium middle and distal segments.  
466 *Nature cell biology*. 2011;13(7):790-8. Epub 2011/06/07. doi: 10.1038/ncb2268. PubMed  
467 PMID: 21642982; PubMed Central PMCID: PMCPMC3129367.
- 468 33. Mallik R, Petrov D, Lex SA, King SJ, Gross SP. Building complexity: an in vitro study  
469 of cytoplasmic dynein with in vivo implications. *Current biology : CB*. 2005;15(23):2075-85.  
470 Epub 2005/12/08. doi: 10.1016/j.cub.2005.10.039. PubMed PMID: 16332532.
- 471 34. Iomini C, Babaev-Khaimov V, Sassaroli M, Piperno G. Protein particles in  
472 *Chlamydomonas* flagella undergo a transport cycle consisting of four phases. *The Journal of*  
473 *cell biology*. 2001;153(1):13-24. Epub 2001/04/04. PubMed PMID: 11285270; PubMed  
474 Central PMCID: PMCPMC2185522.
- 475 35. Engel BD, Ludington WB, Marshall WF. Intraflagellar transport particle size scales  
476 inversely with flagellar length: revisiting the balance-point length control model. *The Journal*  
477 *of cell biology*. 2009;187(1):81-9. Epub 2009/10/07. doi: 10.1083/jcb.200812084. PubMed  
478 PMID: 19805630; PubMed Central PMCID: PMCPMC2762100.
- 479 36. Frokjaer-Jensen C, Davis MW, Hopkins CE, Newman BJ, Thummel JM, Olesen SP,  
480 et al. Single-copy insertion of transgenes in *Caenorhabditis elegans*. *Nature genetics*.  
481 2008;40(11):1375-83. Epub 2008/10/28. doi: 10.1038/ng.248. PubMed PMID: 18953339;  
482 PubMed Central PMCID: PMCPMC2749959.

483

484
